# Supplementary material
Source: publisher figshare collection journal article supplement (https://tandf.figshare.com/articles/dataset/_/5766297)
Supplement: Supplementary file 1 [file 1]

**Supplemental Table 5.** List of chemical compounds in Supplemental Figure 1.

| No. | Compound name                      | Component 1 | Component 2 |
|-----|------------------------------------|-------------|-------------|
| 1   | 2-Aminoadipic acid                 | 0.003       | 0.114       |
| 2   | GABA                               | 0.020       | 0.112       |
| 3   | 2'-Deoxycytidine                   | -0.028      | 0.109       |
| 4   | Mucic acid                         | -0.009      | 0.109       |
| 5   | ADMA                               | -0.024      | 0.108       |
| 6   | 15(S)-HETE                         | 0.024       | 0.107       |
| 7   | <i>N,N</i> -Dimethylglycine        | 0.032       | 0.107       |
| 8   | <i>S</i> -Methylmethionine         | 0.001       | 0.106       |
| 9   | Linoleic acid                      | 0.043       | 0.102       |
| 10  | FA (24:5)                          | 0.032       | 0.098       |
| 11  | 2-Hydroxyvaleric acid              | -0.010      | 0.097       |
| 12  | FA (17:0)                          | -0.022      | 0.095       |
| 13  | FA (16:2)                          | -0.025      | 0.092       |
| 14  | Taurodeoxycholic acid              | 0.052       | 0.091       |
| 15  | AC (15:0)                          | 0.022       | 0.090       |
| 16  | Ophthalmic acid                    | -0.038      | 0.089       |
| 17  | 2-Hydroxybutyric acid              | -0.049      | 0.089       |
| 18  | Nicotinamide                       | -0.031      | 0.087       |
| 19  | Stachydrine                        | 0.053       | 0.085       |
| 20  | Threonic acid                      | 0.019       | 0.084       |
| 21  | FA (22:4)                          | -0.050      | 0.084       |
| 22  | Behenic acid                       | -0.017      | 0.083       |
| 23  | Pyruvic acid                       | 0.038       | 0.081       |
| 24  | 2-Aminobutyric acid                | -0.069      | 0.077       |
| 25  | AC (18:0)                          | -0.041      | 0.077       |
| 26  | 2-Hydroxyisobutyric acid           | -0.011      | 0.076       |
| 27  | Trigonelline                       | -0.063      | 0.072       |
| 28  | cis-11,14-Eicosadienoic acid       | -0.009      | 0.071       |
| 29  | 5-Hydroxylysine                    | 0.023       | 0.070       |
| 30  | <i>N</i> -Methylphenylethanolamine | 0.071       | 0.068       |
| 31  | Benzoic acid                       | -0.026      | 0.068       |
| 32  | Pipecolic acid                     | 0.078       | 0.067       |
| 33  | <i>N</i> -Acetylhistidine          | -0.063      | 0.067       |

|    |                                                                                        |        |       |
|----|----------------------------------------------------------------------------------------|--------|-------|
| 34 | Imidazolelactic acid                                                                   | 0.052  | 0.065 |
| 35 | Ethyl arachidonate                                                                     | 0.041  | 0.063 |
| 36 | Methionine sulfoxide                                                                   | -0.030 | 0.062 |
| 37 | Nervonic acid                                                                          | -0.051 | 0.061 |
| 38 | <i>S</i> -Sulfocysteine                                                                | -0.050 | 0.061 |
| 39 | Sitosterol                                                                             | -0.080 | 0.061 |
| 40 | Pentadecanoic acid                                                                     | 0.082  | 0.060 |
| 41 | Gluconolactone                                                                         | -0.053 | 0.060 |
| 42 | Ribulose 5-phosphate                                                                   | 0.081  | 0.059 |
| 43 | Arachidonic acid                                                                       | -0.072 | 0.059 |
| 44 | FA (19:2)                                                                              | -0.076 | 0.057 |
| 45 | FA (16:3)                                                                              | -0.073 | 0.056 |
| 46 | <i>N</i> <sup>6</sup> , <i>N</i> <sup>6</sup> , <i>N</i> <sup>6</sup> -Trimethyllysine | -0.029 | 0.056 |
| 47 | <i>N</i> <sub>ω</sub> -Methylarginine                                                  | 0.006  | 0.052 |
| 48 | Taurocholic acid                                                                       | -0.079 | 0.051 |
| 49 | Phosphocreatine                                                                        | 0.085  | 0.050 |
| 50 | Deoxycholic acid                                                                       | -0.041 | 0.048 |
| 51 | AC (16:2)                                                                              | -0.038 | 0.047 |
| 52 | Betaine                                                                                | -0.080 | 0.045 |
| 53 | Sarcosine                                                                              | -0.078 | 0.045 |
| 54 | Carnitine                                                                              | 0.084  | 0.044 |
| 55 | 1-Methylnicotinamide                                                                   | 0.088  | 0.042 |
| 56 | AC (17:0)                                                                              | 0.083  | 0.042 |
| 57 | 5-Hydroxytryptophan                                                                    | -0.088 | 0.039 |
| 58 | FA (22:5)                                                                              | 0.074  | 0.038 |
| 59 | Dihydroxyacetone phosphate                                                             | 0.091  | 0.037 |
| 60 | 3-Methylhistidine                                                                      | 0.088  | 0.036 |
| 61 | AC (14:0)                                                                              | -0.086 | 0.034 |
| 62 | Heptadecanoic acid                                                                     | 0.090  | 0.033 |
| 63 | AC (20:0)                                                                              | -0.086 | 0.032 |
| 64 | 2-Amino-2-(hydroxymethyl)-1,3-propanediol                                              | 0.070  | 0.031 |
| 65 | AC (20:1)                                                                              | -0.087 | 0.031 |
| 66 | Uric acid                                                                              | 0.081  | 0.030 |
| 67 | AC (14:2)                                                                              | -0.058 | 0.026 |
| 68 | Corticosterone                                                                         | -0.037 | 0.026 |

|     |                                 |        |        |
|-----|---------------------------------|--------|--------|
| 69  | Phenaceturic acid               | -0.012 | 0.025  |
| 70  | Serotonin                       | -0.093 | 0.024  |
| 71  | Ribose 5-phosphate              | 0.092  | 0.023  |
| 72  | Myristic acid                   | -0.066 | 0.023  |
| 73  | Taurine                         | 0.029  | 0.023  |
| 74  | 1-Methyl-4-imidazoleacetic acid | 0.014  | 0.023  |
| 75  | FA (17:1)                       | 0.017  | 0.022  |
| 76  | Cystathionine                   | 0.092  | 0.019  |
| 77  | Urocanic acid                   | 0.059  | 0.016  |
| 78  | AC (12:0)                       | -0.090 | 0.013  |
| 79  | SDMA                            | -0.003 | 0.013  |
| 80  | Urea                            | 0.088  | 0.013  |
| 81  | <i>O</i> -Acetylcarnitine       | 0.075  | 0.012  |
| 82  | $\alpha$ -Tocopherol            | -0.090 | 0.012  |
| 83  | Asn                             | -0.095 | 0.011  |
| 84  | 1-Methylhistamine               | -0.014 | 0.011  |
| 85  | Stearic acid                    | -0.094 | 0.010  |
| 86  | Palmitoylcarnitine              | -0.076 | 0.008  |
| 87  | Hypotaurine                     | 0.092  | 0.007  |
| 88  | FA (19:1)                       | -0.092 | 0.007  |
| 89  | Linolenic acid                  | 0.094  | 0.007  |
| 90  | Arachidic acid                  | -0.096 | 0.001  |
| 91  | Erucic acid                     | -0.088 | 0.000  |
| 92  | $\beta$ -Ala                    | -0.074 | 0.000  |
| 93  | cis-11-Eicosenoic acid          | -0.096 | -0.002 |
| 94  | N.D.                            | 0.096  | -0.003 |
| 95  | <i>S</i> -Methylcysteine        | -0.015 | -0.005 |
| 96  | Isovalerylalanine               | -0.090 | -0.006 |
| 97  | AC (12:1)                       | -0.091 | -0.008 |
| 98  | Palmitic acid                   | -0.093 | -0.009 |
| 99  | Perillic acid                   | 0.090  | -0.009 |
| 100 | AC (16:1)                       | -0.093 | -0.012 |
| 101 | Homoserine                      | 0.020  | -0.012 |
| 102 | 2-Oxoglutaric acid              | -0.094 | -0.012 |
| 103 | Oleic acid                      | -0.094 | -0.013 |

|     |                                        |        |        |
|-----|----------------------------------------|--------|--------|
| 104 | Testosterone                           | -0.067 | -0.013 |
| 105 | Linoleyl ethanolamide                  | 0.090  | -0.014 |
| 106 | N.D.                                   | -0.092 | -0.014 |
| 107 | AC (18:2)                              | 0.000  | -0.016 |
| 108 | AC (14:1)                              | -0.094 | -0.017 |
| 109 | FA (14:1)                              | -0.095 | -0.017 |
| 110 | Glucose 6-phosphate                    | 0.088  | -0.017 |
| 111 | Glucuronic acid                        | -0.060 | -0.019 |
| 112 | 6-Hydroxyhexanoic acid                 | -0.057 | -0.019 |
| 113 | Guanosine                              | -0.080 | -0.019 |
| 114 | Palmitoleic acid                       | -0.088 | -0.020 |
| 115 | Met                                    | 0.083  | -0.021 |
| 116 | Cholic acid                            | -0.087 | -0.022 |
| 117 | Octanoic acid                          | -0.082 | -0.022 |
| 118 | N.D.                                   | -0.063 | -0.022 |
| 119 | 3-Phosphoglyceric acid                 | 0.094  | -0.023 |
| 120 | His                                    | -0.094 | -0.023 |
| 121 | AC (18:1)                              | -0.072 | -0.023 |
| 122 | Decanoic acid                          | -0.087 | -0.026 |
| 123 | 2-Hydroxyglutaric acid                 | -0.091 | -0.026 |
| 124 | Trimethylamine <i>N</i> -oxide         | -0.087 | -0.026 |
| 125 | 2-Oxoisovaleric acid                   | -0.053 | -0.027 |
| 126 | Stearoyl ethanolamide                  | 0.091  | -0.027 |
| 127 | Fructose 6-phosphate                   | 0.090  | -0.027 |
| 128 | 3-Hydroxytetradecanoic acid            | -0.092 | -0.028 |
| 129 | Hecogenin                              | 0.086  | -0.028 |
| 130 | Pantothenic acid                       | 0.069  | -0.030 |
| 131 | Myristoleic acid                       | -0.089 | -0.030 |
| 132 | Glutathione (GSSG)_divalent            | 0.089  | -0.030 |
| 133 | cis-5,8,11,14,17-Eicosapentaenoic acid | 0.073  | -0.031 |
| 134 | Inosine                                | 0.027  | -0.031 |
| 135 | Ala                                    | 0.081  | -0.031 |
| 136 | Glycerophosphocholine                  | -0.090 | -0.032 |
| 137 | Citrulline                             | -0.038 | -0.034 |
| 138 | Stearidonic acid                       | -0.049 | -0.034 |

|     |                                          |        |        |
|-----|------------------------------------------|--------|--------|
| 139 | Ricinoleic acid                          | -0.079 | -0.035 |
| 140 | Lauric acid                              | -0.086 | -0.036 |
| 141 | Creatinine                               | 0.036  | -0.036 |
| 142 | Cholesterol sulfate                      | -0.073 | -0.036 |
| 143 | Isovalerylcarnitine                      | 0.087  | -0.036 |
| 144 | 5-Oxoproline                             | -0.038 | -0.038 |
| 145 | Sedoheptulose 7-phosphate                | 0.090  | -0.038 |
| 146 | Ethanolamine phosphate                   | 0.086  | -0.039 |
| 147 | cis-4,7,10,13,16,19-Docosahexaenoic acid | 0.004  | -0.039 |
| 148 | FA (20:3)                                | -0.086 | -0.042 |
| 149 | Butyrylcarnitine                         | -0.086 | -0.042 |
| 150 | Phosphoenolpyruvic acid                  | 0.075  | -0.042 |
| 151 | Isethionic acid                          | 0.085  | -0.043 |
| 152 | FA (14:2)                                | -0.088 | -0.043 |
| 153 | Cystine                                  | -0.076 | -0.043 |
| 154 | FA (19:0)                                | 0.004  | -0.046 |
| 155 | Lactic acid                              | 0.072  | -0.046 |
| 156 | FA (22:3)                                | -0.083 | -0.046 |
| 157 | Cholesterol                              | 0.068  | -0.047 |
| 158 | cis-8,11,14-Eicosatrienoic acid          | -0.030 | -0.048 |
| 159 | Gluconic acid                            | -0.085 | -0.050 |
| 160 | N.D.                                     | -0.084 | -0.051 |
| 161 | FA (14:1)                                | -0.071 | -0.051 |
| 162 | Hydroxyprogesterone caproate             | 0.078  | -0.051 |
| 163 | Hydroxyproline                           | -0.084 | -0.052 |
| 164 | Ethanolamine                             | 0.065  | -0.053 |
| 165 | N <sup>6</sup> -Acetyllysine             | -0.079 | -0.054 |
| 166 | 8-Hydroxyoctanoic acid                   | -0.082 | -0.054 |
| 167 | Erythrose 4-phosphate                    | -0.065 | -0.055 |
| 168 | 3-Aminobutyric acid                      | 0.081  | -0.055 |
| 169 | 3-Indoxylsulfuric acid                   | -0.072 | -0.055 |
| 170 | Glycerol 3-phosphate                     | -0.038 | -0.055 |
| 171 | Succinic acid                            | 0.080  | -0.056 |
| 172 | Diethanolamine                           | 0.060  | -0.058 |
| 173 | Gly                                      | 0.082  | -0.059 |

|     |                                     |        |        |
|-----|-------------------------------------|--------|--------|
| 174 | Isocitric acid                      | -0.078 | -0.059 |
| 175 | Thr                                 | -0.079 | -0.060 |
| 176 | Homovanillic acid                   | 0.008  | -0.060 |
| 177 | <i>N</i> -Glycolylneuraminic acid   | 0.012  | -0.061 |
| 178 | $\gamma$ -Butyrobetaine             | 0.078  | -0.065 |
| 179 | Cytidine                            | 0.034  | -0.065 |
| 180 | Acetoacetic acid                    | -0.052 | -0.066 |
| 181 | Ser                                 | -0.074 | -0.066 |
| 182 | Lys                                 | -0.071 | -0.067 |
| 183 | Phe                                 | 0.053  | -0.069 |
| 184 | Anserine_divalent                   | -0.034 | -0.070 |
| 185 | Palmitoylethanolamide               | 0.073  | -0.070 |
| 186 | FA (12:0)                           | 0.064  | -0.071 |
| 187 | Tyr                                 | -0.072 | -0.071 |
| 188 | <i>N</i> -Acetyl glycine            | 0.074  | -0.071 |
| 189 | Indole-3-carboxaldehyde             | -0.033 | -0.072 |
| 190 | Glu                                 | 0.064  | -0.072 |
| 191 | Oleoyl ethanolamide                 | -0.041 | -0.074 |
| 192 | 10-Hydroxydecanoic acid             | -0.072 | -0.075 |
| 193 | Guanidoacetic acid                  | 0.050  | -0.075 |
| 194 | Citric acid                         | -0.066 | -0.076 |
| 195 | Trp                                 | 0.070  | -0.077 |
| 196 | Spermidine                          | 0.031  | -0.078 |
| 197 | Campesterol                         | -0.066 | -0.079 |
| 198 | Asp                                 | 0.054  | -0.079 |
| 199 | Carnosine                           | -0.062 | -0.081 |
| 200 | Hexylamine                          | 0.048  | -0.081 |
| 201 | Pelargonic acid                     | -0.064 | -0.081 |
| 202 | Ascorbic acid                       | 0.055  | -0.081 |
| 203 | 5-Methoxyindoleacetic acid          | -0.059 | -0.083 |
| 204 | Kynurenine                          | -0.030 | -0.086 |
| 205 | Histamine                           | 0.023  | -0.087 |
| 206 | Arg                                 | -0.054 | -0.088 |
| 207 | <i>N</i> <sup>6</sup> -Methyllysine | -0.004 | -0.089 |
| 208 | 4-Acetamidobutanoic acid            | -0.008 | -0.089 |

|     |                                                       |        |        |
|-----|-------------------------------------------------------|--------|--------|
| 209 | Dyphylline                                            | 0.054  | -0.090 |
| 210 | 3-Hydroxybutyric acid                                 | -0.045 | -0.090 |
| 211 | Leu                                                   | 0.048  | -0.091 |
| 212 | Cysteine glutathione disulfide                        | 0.036  | -0.091 |
| 213 | Malic acid                                            | -0.020 | -0.091 |
| 214 | <i>N</i> -Ethylmaleimide_+H <sub>2</sub> O            | 0.045  | -0.092 |
| 215 | Glyceric acid                                         | -0.017 | -0.094 |
| 216 | Sphinganine                                           | 0.042  | -0.094 |
| 217 | Creatine                                              | -0.048 | -0.096 |
| 218 | Pro                                                   | -0.050 | -0.097 |
| 219 | Adipic acid                                           | 0.035  | -0.098 |
| 220 | Val                                                   | 0.046  | -0.098 |
| 221 | <i>N</i> -Acetylaspartic acid                         | 0.046  | -0.100 |
| 222 | Putrescine                                            | -0.016 | -0.100 |
| 223 | Uridine                                               | 0.046  | -0.100 |
| 224 | N.D.                                                  | 0.045  | -0.101 |
| 225 | Hypoxanthine                                          | 0.038  | -0.103 |
| 226 | Glycerol                                              | -0.041 | -0.103 |
| 227 | Ile                                                   | 0.015  | -0.103 |
| 228 | Gln                                                   | -0.041 | -0.103 |
| 229 | <i>O</i> -Succinylhomoserine                          | -0.040 | -0.104 |
| 230 | Triethanolamine                                       | 0.039  | -0.105 |
| 231 | 2-Hydroxy-4-methylvaleric acid                        | 0.038  | -0.105 |
| 232 | Choline                                               | 0.038  | -0.105 |
| 233 | N.D.                                                  | 0.032  | -0.105 |
| 234 | Hexanoic acid                                         | -0.022 | -0.106 |
| 235 | N.D.                                                  | 0.001  | -0.106 |
| 236 | <i>N</i> <sup>5</sup> -Ethylglutamine                 | 0.018  | -0.107 |
| 237 | Sphingosine                                           | 0.025  | -0.108 |
| 238 | 4-Methyl-2-oxovaleric acid/3-Methyl-2-oxovaleric acid | 0.011  | -0.109 |
| 239 | <i>O</i> -Acetylhomoserine                            | -0.018 | -0.111 |
| 240 | 11-Aminoundecanoic acid                               | 0.010  | -0.112 |
| 241 | Ornithine                                             | 0.012  | -0.112 |
| 242 | <i>cis</i> -Aconitic acid                             | -0.017 | -0.113 |

FA, Fatty acid; AC, Asylcarnitine; N.D., not determined.
