# Supplementary material
Source: publisher figshare collection journal article supplement (https://tandf.figshare.com/articles/dataset/_/5766297)
Supplement: Supplementary file 2 [file 1]

Supplemental Table 1. Menu card of the Japanese diets.

| Menu card of the 1960 Japanese diet |                                                          |                                                          |                                                                     |                                                               |                                                                  |                                                  |                                                                                         |
|-------------------------------------|----------------------------------------------------------|----------------------------------------------------------|---------------------------------------------------------------------|---------------------------------------------------------------|------------------------------------------------------------------|--------------------------------------------------|-----------------------------------------------------------------------------------------|
|                                     | Day 1                                                    | Day 2                                                    | Day 3                                                               | Day 4                                                         | Day 5                                                            | Day 6                                            | Day 7                                                                                   |
| Break-fast                          | Boiled Barley and Rice                                   | Toast                                                    | Mixed Rice with dried whitebait and Green-Seaweed Flakes            | Boiled Barley and Rice                                        | Boiled Barley and Rice                                           | Toast                                            | Boiled Barley and Rice                                                                  |
|                                     | Miso Soup with Littleneck Clams                          | Vegetable Saute                                          | Taro and Japanese Mustard                                           | Dried Sardines                                                | Natto (Fermented Soybeans)                                       | Scrambled Eggs                                   | Japanese Mustard Spinach and Deep-Fried Tofu Miso Soup                                  |
|                                     | Chilled Tofu                                             | Fruit                                                    | Spinach Miso Soup                                                   | Tofu and <i>Wakame</i>                                        | Miso Soup with Potato                                            | Potato and Onion Saute                           | Squash Boiled with Adzuki Beans                                                         |
|                                     | Pickles                                                  | Milk                                                     | Cooked Beans                                                        | Seaweed Miso Soup                                             | Pickles                                                          | Fruit                                            | Dried Laver                                                                             |
| Lunch                               | Food Boiled in Soy Sauce                                 |                                                          |                                                                     | Food Boiled in Soy Sauce                                      |                                                                  |                                                  | Seaweed                                                                                 |
|                                     | Rice                                                     | Boiled Barley and Rice                                   | Sauteed Wheat Noodles                                               | <i>Somen</i>                                                  | Wheat Noodles with Raw Egg                                       | Boiled Barley and Rice                           | Rice                                                                                    |
|                                     | Simmered Pumpkin and Ground Chicken                      | Simmered Soybeans and Kelp                               | Fruit                                                               | Steamed Sweet Potatoes                                        | Fruit                                                            | Parched <i>Tofu</i>                              | Seared Bonito                                                                           |
|                                     | Cucumber and <i>Wakame</i> Seaweed with Vinegar Dressing | Sweet Potato Boiled in Sugar                             |                                                                     |                                                               |                                                                  | Pickles                                          | Burdock <i>Kinpira</i>                                                                  |
| Dinner                              | Pickles                                                  | Pickles                                                  |                                                                     |                                                               |                                                                  |                                                  |                                                                                         |
|                                     | Rice                                                     | Rice                                                     | Rice                                                                | Rice                                                          | Rice                                                             | Rice                                             | Rice                                                                                    |
|                                     | Tuna and Grated Yam                                      | <i>Sake</i> -Steamed Short-Necked Clams                  | Miso-Marinated Grilled Spanish Mackerel                             | Simmered Pork and White Radish in Miso                        | Salt-Grilled Mackerel                                            | Simmered Squid with Taro                         | Stewed Meat Balls and Cabbage                                                           |
|                                     | Sauteed Eggplant with <i>Miso</i>                        | Simmered <i>Kiriboshi-Daikon</i> Miso Soup with Eggplant | Simmered <i>Hijiki</i> Seaweed and Lotus Root                       | Pickled Spinach Dipped in Sauce                               | Simmered <i>Hijiki</i> Seaweed Cabbage and Bean Sprout Miso Soup | White Radish and <i>Wakame</i> Seaweed Miso Soup | Fluffy Boiled Potatoes                                                                  |
| Menu card of the 1975 Japanese diet |                                                          |                                                          |                                                                     |                                                               |                                                                  |                                                  |                                                                                         |
|                                     | Day 1                                                    | Day 2                                                    | Day 3                                                               | Day 4                                                         | Day 5                                                            | Day 6                                            | Day 7                                                                                   |
| Break-fast                          | Rice                                                     | Raisin Bread                                             | Rice                                                                | Toast                                                         | Rice                                                             | Toast                                            | Rice                                                                                    |
|                                     | Salt-Grilled Salmon                                      | Omelet                                                   | Hard-Cured Horse Mackerel                                           | Bacon and Eggs                                                | Rolled Egg                                                       | Boiled egg                                       | <i>Sake</i> -Steamed Short-Necked Clams and Cabbage                                     |
|                                     | Natto (Fermented Soybeans)                               | Sausage and Cabbage Saute                                | Stewed Short-Necked Clams with Japanese Mustard Spinach             | Yogurt with Fruit                                             | Natto (Fermented Soybeans)                                       | Tuna Salad with Broccoli                         | Natto (Fermented Soybeans)                                                              |
|                                     | Chinese Cabbage and Bean Sprout Miso Soup                | Fruit                                                    | Scarlet Runner Beans Boiled in Sugar and Soy Sauce                  |                                                               | Cabbage and Deep-Fried Tofu Miso Soup                            | Fruit                                            | Tofu and Deep-Fried Tofu Miso Soup                                                      |
| Lunch                               |                                                          | Milk                                                     | Miso Soup with Eggplant                                             |                                                               | Fruit                                                            | Milk                                             |                                                                                         |
|                                     | <i>Udon</i> Noodles with Deep-Fried Tofu                 | Fried Rice                                               | Japanese-Style Chow Mein                                            | Sweet Potato Rice                                             | Chicken and Egg on Rice                                          | Rice                                             | Sandwich                                                                                |
|                                     | Fruit                                                    | Seaweed Soup                                             | Fruits <i>Mitsumame</i>                                             | Simmered Freeze-Dried Tofu Miso Soup with Pork and Vegetables | Red and White Salad                                              | Sauteed Eggplant with Mince                      | Consomme                                                                                |
|                                     |                                                          |                                                          |                                                                     |                                                               | Food Boiled in Soy Sauce                                         | Simmered <i>Hijiki</i> Seaweed                   | Fruit                                                                                   |
| Dinner                              | Rice                                                     | Rice                                                     | Rice                                                                | Rice                                                          | Rice                                                             | Rice                                             | Rice                                                                                    |
|                                     | Braised Meat and Vegetables                              | Chicken and Vegetables                                   | Cream Stew                                                          | Simmered Mackerel in <i>Miso</i>                              | Marinated Horse Mackerel,                                        | Simmered Flatfish                                | Sliced Raw Fish                                                                         |
|                                     | <i>Mozuku</i> Seaweed Vinegar                            | <i>Chikuzen</i> Style Chilled Tofu                       | Pickled Chinese Cabbage and Dried Shrimp Dipped in Sauce            | Cooked Beans with Various Vegetables                          | <i>Nanban</i> -Style Tofu <i>Dengaku</i>                         | Simmered <i>Okara</i> Tofu Lees                  | Simmered <i>Satsuma Age</i> (Deep-Fried Minced Fish and Vegetables) and Chinese Cabbage |
|                                     | Clear Cabbage and Egg Soup                               | Spinach and Deep-Fried Tofu Miso Soup                    | Marinated Cucumber and <i>Hijiki</i> Seaweed                        | Clear Chinese Cabbage and <i>Wakame</i> Seaweed Soup          | Clear Squash and Japanese Mustard Spinach Soup                   | Taro and White Radish Miso Soup                  | Tofu and Vegetables in a Sesame Sauce                                                   |
| Menu card of the 1990 Japanese diet |                                                          |                                                          |                                                                     |                                                               |                                                                  |                                                  |                                                                                         |
|                                     | Day 1                                                    | Day 2                                                    | Day 3                                                               | Day 4                                                         | Day 5                                                            | Day 6                                            | Day 7                                                                                   |
| Break-fast                          | Rice                                                     | Rice                                                     | Pizza Toast                                                         | Toast                                                         | Rice                                                             | Toast                                            | Rice                                                                                    |
|                                     | Salt-Grilled Salmon                                      | Salt-Grilled Mackerel                                    | Tuna Salad with Taro                                                | Bacon and Eggs                                                | Hard-Cured Horse Mackerel                                        | Omelet                                           | Rolled Egg                                                                              |
|                                     | Japanese Mustard Spinach with Peanut Dressing            | Pickled Spinach Dipped in Sauce                          | Fruit                                                               | Fluffy Boiled Potatoes                                        | Natto (Fermented Soybeans)                                       | Tuna Salad with Green Asparagus                  | Simmered <i>Hijiki</i> Seaweed                                                          |
|                                     | Natto (Fermented Soybeans)                               | Natto (Fermented Soybeans)                               | Milk                                                                | Fruit                                                         | Sweet Potato and Japanese Mustard Spinach Miso Soup              | Fruit                                            | Sweet Potato and <i>Shimeji</i> Mushrooms                                               |
| Lunch                               | Tofu and <i>Wakame</i> Seaweed Miso Soup                 | Chinese Cabbage and Deep-Fried Tofu Miso Soup            |                                                                     | Milk                                                          |                                                                  | Milk                                             | Miso Soup                                                                               |
|                                     |                                                          |                                                          |                                                                     |                                                               | Pickles                                                          |                                                  | Pickles                                                                                 |
|                                     | Spaghetti with Meat Sauce                                | Curry and Rice                                           | Ramen (Chinese Noodle Soup)                                         | Fried Rice                                                    | Chicken and Egg on Rice                                          | Beef Bowl                                        | Hamburger                                                                               |
|                                     | Salad                                                    | Yogurt with Fruit                                        |                                                                     | Fried Dumpling                                                | Cucumber and <i>Wakame</i> Seaweed with Vinegar Dressing         | Simmered Spicy <i>Konnyaku</i>                   | French fries                                                                            |
| Dinner                              | Fruit                                                    |                                                          |                                                                     |                                                               |                                                                  | Tofu and Deep-Fried Tofu Miso Soup               | Orange Juice                                                                            |
|                                     | Rice                                                     | Rice                                                     | Rice                                                                | Rice                                                          | Rice                                                             | Bread                                            | Rice                                                                                    |
|                                     | Ginger Pork Saute                                        | Sichuan style bean curd                                  | Aluminium Foil-Steamed <i>Scomberomorus niphonius</i>               | Simmered Flatfish                                             | Chicken and Vegetables                                           | Seafood Gratin                                   | Fried Horse Mackerel                                                                    |
|                                     | Potato Salad                                             | Prawns with Chili Sauce                                  | Tofu and Vegetables in a Sesame Sauce                               | Chilled Tofu                                                  | <i>Chikuzen</i> Style Broccoli Tossed with Mustard Sauce         | Seaweed Salad                                    | Lotus Root <i>Kinpira</i>                                                               |
| Dinner                              | Onion and Beans Soup                                     | Spicy Pickled Cucumber                                   | Beaten Egg Soup                                                     | Simmered Pumpkin                                              | Clear White Radish and <i>Shimeji</i> Mushrooms Soup             |                                                  | Grilled Eggplant                                                                        |
|                                     |                                                          |                                                          |                                                                     |                                                               |                                                                  |                                                  |                                                                                         |
|                                     |                                                          |                                                          |                                                                     | Cabbage and Enoki Mushroom Miso Soup                          |                                                                  |                                                  | Miso Soup with White Radish                                                             |
|                                     |                                                          |                                                          |                                                                     |                                                               |                                                                  |                                                  |                                                                                         |
| Menu card of the 2005 Japanese diet |                                                          |                                                          |                                                                     |                                                               |                                                                  |                                                  |                                                                                         |
|                                     | Day 1                                                    | Day 2                                                    | Day 3                                                               | Day 4                                                         | Day 5                                                            | Day 6                                            | Day 7                                                                                   |
| Break-fast                          | Rice                                                     | Toast                                                    | Toast                                                               | Rice                                                          | Rice                                                             | Toast                                            | Sweet Potato Rice                                                                       |
|                                     | Salt-Grilled Salmon                                      | Clam Chowder                                             | Omelet                                                              | Hard-Cured Horse Mackerel                                     | Rolled Egg                                                       | Sunny-Side up Egg                                | Capelin                                                                                 |
|                                     | Pickled Spinach Dipped in Sauce                          | Fruit                                                    | Rolled Bacon and Asparagus                                          | Simmered Chinese Cabbage with Deep-Fried Tofu                 | Marinated Cabbage with Yukari                                    | Taro and Cabbage Soup                            | Simmered Japanese Mustard Spinach with Deep-Fried Tofu                                  |
|                                     | Natto (Fermented Soybeans)                               |                                                          | Fruit                                                               | Bean Sprout and <i>Wakame</i> Seaweed Miso Soup               | Natto (Fermented Soybeans)                                       | Fruit                                            | Miso Soup with Littleneck Clams                                                         |
| Lunch                               | Tofu and Onion Miso Soup                                 |                                                          | Milk                                                                |                                                               | Tofu and Mushroom Miso Soup                                      | Milk                                             | Fruit                                                                                   |
|                                     | "As-You-Like-It" Pancake                                 | Ramen (Chinese Noodle Soup)                              | Spaghetti with Meat Sauce                                           | Hamburger                                                     | Curry and Rice                                                   | Eel on Rice                                      | Omelet Rice                                                                             |
|                                     | Marinated Bean Sprout                                    |                                                          | Pumpkin Salad                                                       | Salad                                                         | Yogurt with Fruit                                                | Cabbage and <i>Wakame</i> Seaweed with Vinegar   | Salad                                                                                   |
|                                     | Fruit                                                    |                                                          |                                                                     | Juice                                                         |                                                                  |                                                  | Pumpkin Soup                                                                            |
| Dinner                              | Rice                                                     | Rice                                                     | Rice                                                                | Rice                                                          | Macaroni Gratin                                                  | Rice                                             | Rice                                                                                    |
|                                     | Ginger Pork Saute                                        | Simmered Mackerel                                        | Aluminium Foil-Steamed <i>Scomberomorus niphonius</i>               | Japanese-Style Fried-Chicken                                  | Tuna Salad with Broccoli                                         | Sichuan style bean curd                          | Potato Croquette                                                                        |
|                                     | Potato Salad                                             | Grilled Eggplant-Salad                                   | Burdock <i>Kinpira</i>                                              | Radish Salad                                                  |                                                                  | Prawns with Chili Sauce                          | Lotus Root-Salad                                                                        |
|                                     | Onion and Beans Soup                                     | Simmered Taro                                            | <i>Komatsuna</i> Japanese Mustard Spinach Tossed with Mustard Sauce | Simmered lotus root with carrot                               |                                                                  | Spicy Pickled Cucumber                           | Marinated Chicken and Okra                                                              |

Supplemental Table 2. Trends in food intake ratio by food groups in the Japanese diets in each dates.

|                          | 1960     | 1975  | 1990  | 2005  |
|--------------------------|----------|-------|-------|-------|
|                          | (g/100g) |       |       |       |
| Grains                   | 45.59    | 27.74 | 23.37 | 21.52 |
| Potatoes                 | 5.94     | 4.87  | 5.54  | 5.18  |
| Sugar and Sweeteners     | 1.13     | 1.42  | 0.49  | 0.31  |
| Legumes                  | 4.07     | 5.25  | 5.20  | 4.52  |
| Seeds and Nuts           | 0.08     | 0.03  | 0.17  | 0.13  |
| Vegetables               | 16.50    | 17.30 | 20.06 | 22.89 |
| Fruits                   | 6.04     | 13.79 | 10.85 | 11.15 |
| Mushrooms                | 0.33     | 0.66  | 1.04  | 1.41  |
| Seaweeds                 | 0.95     | 0.96  | 0.34  | 0.08  |
| Fishes and Shellfishes   | 7.07     | 6.68  | 7.03  | 6.80  |
| Meat and Poultry         | 1.71     | 4.46  | 5.65  | 6.11  |
| Eggs                     | 1.71     | 3.11  | 3.05  | 2.94  |
| Milk and Dairy Products  | 2.50     | 7.47  | 10.11 | 10.21 |
| Fat and Oils             | 0.29     | 0.69  | 1.16  | 1.48  |
| Seasonings and Beverages | 6.10     | 5.56  | 5.95  | 5.26  |

Supplemental Table 3. Nutritional compositions of the Japanese diets in each dates.

|              |             | 1960 | 1975 | 1990 | 2005 |
|--------------|-------------|------|------|------|------|
| Energy       | (kcal/100g) | 377  | 385  | 390  | 396  |
| Protein      | (g/100g)    | 18.7 | 20.5 | 21.7 | 21.5 |
| Fat          | (g/100g)    | 4.6  | 6.4  | 7.5  | 8.7  |
| Carbohydrate | (g/100g)    | 65.4 | 61.5 | 59.0 | 58.0 |
