# Supplementary material
Source: publisher figshare collection journal article supplement (https://tandf.figshare.com/articles/dataset/_/5766297)
Supplement: Supplementary file 3 [file 1]

# Supplemental Figure 1

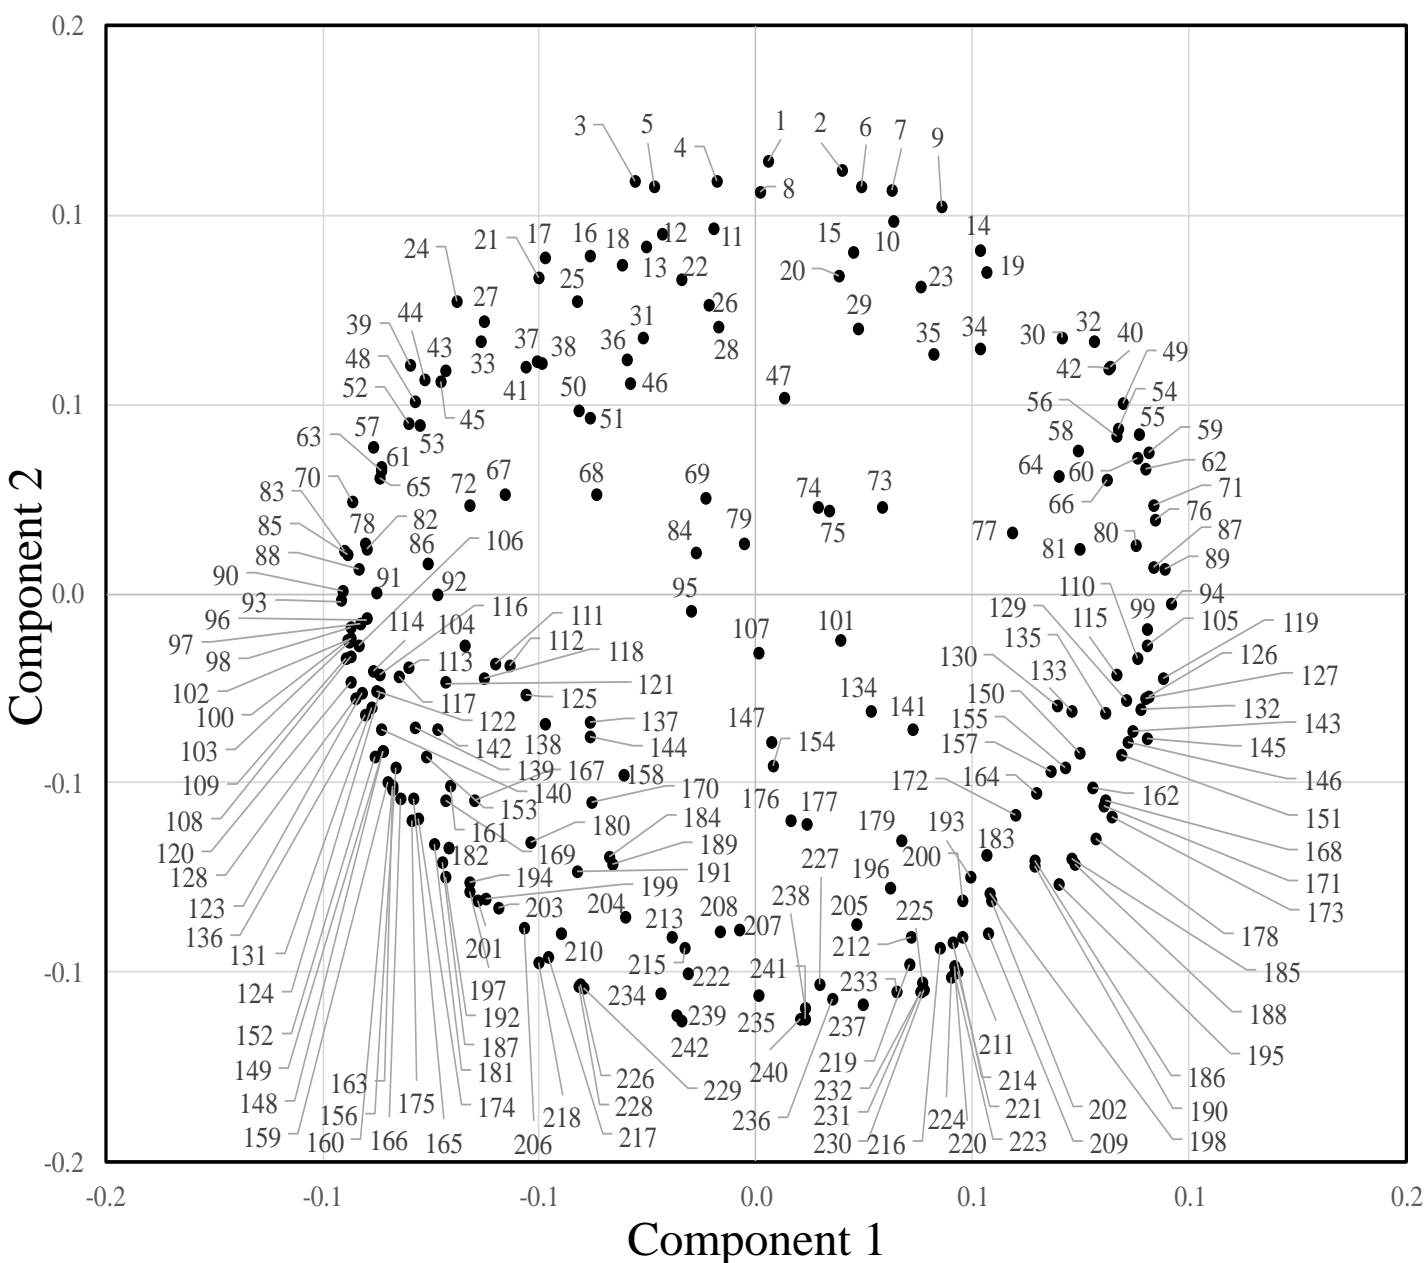

**Supplemental Figure 1. Principal component analysis charts (loading plot).**

Principle components 1 and 2 for individual components in serum of the 1960, 1975, 1990, and 2005 groups. Each number indicates a compound, and its list is shown in Supplemental Table 5.
