# Supplementary material
Source: publisher figshare collection journal article supplement (https://tandf.figshare.com/articles/dataset/_/5766297)
Supplement: Supplementary file 4 [file 1]

**Supplemental Table 4.** Measurement results of two mass spectrometers

| Compound name                                  | Relative area |         |         |         | KEGG ID                |
|------------------------------------------------|---------------|---------|---------|---------|------------------------|
|                                                | 1960          | 1975    | 1990    | 2005    |                        |
| 1-Methylnicotinamide                           | N.D.          | 6.2E-05 | 8.0E-05 | 6.9E-05 | C02918                 |
| Perillic acid                                  | N.D.          | 9.1E-05 | 1.1E-04 | 1.7E-04 | C11924                 |
| Phosphocreatine                                | N.D.          | 7.0E-05 | 8.1E-05 | 7.0E-05 | C02305                 |
| Asylcarnitine (fatty acid; 17:0)               | N.D.          | 1.2E-05 | 1.1E-05 | 1.2E-05 | No ID                  |
| GABA                                           | N.D.          | 1.3E-04 | 1.1E-04 | N.D.    | C00334                 |
| S-Methylmethionine                             | N.D.          | 3.0E-04 | 1.2E-04 | N.D.    | C03172                 |
| Behenic acid                                   | N.D.          | 6.3E-06 | N.D.    | N.D.    | C08281                 |
| Hydroxyprogesterone caproate                   | 6.9E-06       | 2.1E-05 | 2.6E-05 | 6.1E-05 | C08148                 |
| 2-Amino-2-(hydroxymethyl)-1,3-propanediol      | 2.3E-04       | 6.2E-04 | 3.0E-03 | 1.2E-03 | C07182                 |
| Stachydrine                                    | 9.2E-04       | 2.4E-03 | 2.0E-03 | 1.7E-03 | C10172                 |
| Dihydroxyacetone phosphate                     | 7.9E-05       | 1.6E-04 | 2.0E-04 | 1.7E-04 | C00111                 |
| Deoxycholic acid                               | 2.2E-05       | 4.1E-05 | 9.1E-06 | 1.9E-05 | C04483                 |
| Ribose 5-phosphate                             | 1.4E-04       | 2.5E-04 | 2.7E-04 | 2.8E-04 | C00117                 |
| Asylcarnitine (fatty acid; 15:0)               | 1.2E-05       | 2.1E-05 | 1.6E-05 | 1.5E-05 | No ID                  |
| Ribulose 5-phosphate                           | 8.9E-04       | 1.4E-03 | 1.7E-03 | 1.4E-03 | C00199, C01101         |
| Taurodeoxycholic acid                          | 5.9E-06       | 9.2E-06 | 8.5E-06 | 7.5E-06 | C05463                 |
| Asylcarnitine (fatty acid; 18:2)               | 6.3E-05       | 9.7E-05 | 3.8E-05 | 9.5E-05 | No ID                  |
| <i>cis</i> -5,8,11,14,17-Eicosapentaenoic acid | 5.8E-04       | 8.7E-04 | 7.7E-04 | 1.2E-03 | C06428                 |
| Glucose 6-phosphate                            | 2.3E-04       | 3.4E-04 | 3.6E-04 | 4.5E-04 | C00668, C01172, C00092 |
| Heptadecanoic acid                             | 4.5E-05       | 6.6E-05 | 7.0E-05 | 7.0E-05 | No ID                  |
| 2-Aminoadipic acid                             | 5.7E-04       | 8.2E-04 | 7.7E-04 | 5.0E-04 | C00956                 |
| Sedoheptulose 7-phosphate                      | 5.2E-05       | 7.4E-05 | 1.2E-04 | 1.6E-04 | C05382                 |
| Fatty acid (24:5)                              | 1.4E-05       | 2.0E-05 | 1.8E-05 | 1.6E-05 | No ID                  |
| 21-Deoxycortisol<br>Corticosterone             | 2.2E-04       | 3.1E-04 | 1.4E-04 | 2.2E-04 | C05497<br>C02140       |
| Fatty acid (22:5)                              | 5.7E-04       | 8.0E-04 | 7.3E-04 | 7.9E-04 | No ID                  |
| Asylcarnitine (fatty acid; 16:2)               | 4.0E-05       | 5.5E-05 | 3.0E-05 | 3.8E-05 | No ID                  |
| 1-Methyl-4-imidazoleacetic acid                | 1.6E-04       | 2.2E-04 | 1.6E-04 | 2.0E-04 | C05828                 |
| Imidazolelactic acid                           | 7.5E-05       | 1.0E-04 | 8.8E-05 | 9.1E-05 | C05568                 |
| Benzoic acid                                   | 2.6E-04       | 3.4E-04 | 2.4E-04 | 2.6E-04 | C00180                 |

|                                    |         |         |         |         |                |
|------------------------------------|---------|---------|---------|---------|----------------|
| Phenaceturic acid                  | 1.2E-04 | 1.5E-04 | 9.9E-05 | 1.3E-04 | C05598         |
| Pentadecanoic acid                 | 1.2E-05 | 1.5E-05 | 1.7E-05 | 1.5E-05 | No ID          |
| Fatty acid (17:0)                  | 2.4E-05 | 3.1E-05 | 3.9E-05 | N.D.    | No ID          |
| <i>N,N</i> -Dimethylglycine        | 4.8E-03 | 6.3E-03 | 5.9E-03 | 5.1E-03 | C01026         |
| Pipecolic acid                     | 1.5E-03 | 1.9E-03 | 2.0E-03 | 1.9E-03 | C00408         |
| <i>Unknown compound</i>            | 2.9E-04 | 3.7E-04 | 4.5E-04 | 4.6E-04 | No ID          |
| Urocanic acid                      | 2.9E-04 | 3.7E-04 | 3.2E-04 | 3.7E-04 | C00785         |
| Threonic acid                      | 1.4E-03 | 1.8E-03 | 1.5E-03 | 1.5E-03 | C01620         |
| Phosphoenolpyruvic acid            | 1.4E-04 | 1.8E-04 | 1.7E-04 | 2.3E-04 | C00074         |
| Ophthalmic acid                    | 2.3E-04 | 2.9E-04 | 2.2E-04 | 2.1E-04 | No ID          |
| Fructose 6-phosphate               | 4.6E-05 | 5.6E-05 | 6.2E-05 | 7.3E-05 | C05345, C00085 |
| 15(S)-HETE                         | 1.7E-03 | 2.1E-03 | 2.2E-03 | 1.7E-03 | C04742         |
| <i>N</i> -Methylphenylethanolamine | 1.7E-05 | 2.0E-05 | 2.0E-05 | 1.9E-05 | C03711         |
| Nervonic acid                      | 1.7E-05 | 2.0E-05 | 1.4E-05 | 1.5E-05 | C08323         |
| Trigonelline                       | 1.7E-04 | 2.0E-04 | 1.4E-04 | 1.3E-04 | C01004         |
| Asylcarnitine (fatty acid; 18:0)   | 1.8E-04 | 2.1E-04 | 1.7E-04 | 1.7E-04 | No ID          |
| Mucic acid                         | 2.1E-04 | 2.5E-04 | 2.5E-04 | 1.8E-04 | C00879, C01807 |
| Asylcarnitine (fatty acid; 14:2)   | 3.4E-05 | 4.0E-05 | 2.4E-05 | 3.0E-05 | No ID          |
| 2-Hydroxybutyric acid              | 2.7E-03 | 3.1E-03 | 2.5E-03 | 2.3E-03 | C05984         |
| Urea                               | 6.2E-01 | 7.1E-01 | 7.1E-01 | 7.5E-01 | C00086         |
| 2-Hydroxyvaleric acid              | 2.0E-03 | 2.3E-03 | 2.1E-03 | 2.0E-03 | No ID          |
| Fatty acid (16:2)                  | 4.2E-05 | 4.8E-05 | 4.2E-05 | 4.1E-05 | No ID          |
| Linolenic acid                     | 9.1E-04 | 1.0E-03 | 1.1E-03 | 1.1E-03 | C06427         |
| Cystathionine                      | 1.9E-04 | 2.2E-04 | 2.5E-04 | 2.4E-04 | C00542, C02291 |
| 3-Phosphoglyceric acid             | 1.9E-04 | 2.1E-04 | 2.5E-04 | 2.6E-04 | C00197         |
| Linoleic acid                      | 1.2E-02 | 1.3E-02 | 1.3E-02 | 1.2E-02 | C01595         |
| Methionine sulfoxide               | 6.2E-04 | 6.9E-04 | 6.0E-04 | 6.2E-04 | C02989         |
| <i>N</i> -Glycolylneuraminic acid  | 6.0E-05 | 6.7E-05 | 4.5E-05 | 8.2E-05 | C03410         |
| Gluconolactone                     | 7.7E-04 | 8.6E-04 | 7.1E-04 | 7.3E-04 | C00198         |
| Ethanolamine phosphate             | 2.3E-04 | 2.5E-04 | 2.7E-04 | 3.0E-04 | C00346         |
| SDMA                               | 1.4E-04 | 1.6E-04 | 1.4E-04 | 1.5E-04 | No ID          |
| 2'-Deoxycytidine                   | 1.5E-04 | 1.6E-04 | 1.5E-04 | 1.3E-04 | C00881         |
| ADMA                               | 3.1E-04 | 3.4E-04 | 3.2E-04 | 3.0E-04 | C03626         |
| Pyruvic acid                       | 1.4E-03 | 1.5E-03 | 1.7E-03 | 1.4E-03 | C00022         |
| Hypotaurine                        | 3.9E-04 | 4.2E-04 | 4.9E-04 | 4.7E-04 | C00519         |

|                                                  |         |         |         |         |                          |
|--------------------------------------------------|---------|---------|---------|---------|--------------------------|
| Taurine                                          | 1.9E-02 | 2.1E-02 | 1.9E-02 | 2.0E-02 | C00245                   |
| Fatty acid (19:0)                                | 1.6E-05 | 1.8E-05 | 1.5E-05 | 1.9E-05 | No ID                    |
| Homovanillic acid                                | 8.0E-05 | 8.5E-05 | 6.7E-05 | 9.6E-05 | C05582                   |
| Pantothenic acid                                 | 5.6E-05 | 5.9E-05 | 5.8E-05 | 6.2E-05 | C00864                   |
| <i>cis</i> -11,14-Eicosadienoic acid             | 9.7E-05 | 1.0E-04 | 9.7E-05 | 9.8E-05 | C16525                   |
| Sarcosine                                        | 5.2E-04 | 5.5E-04 | 4.3E-04 | 4.3E-04 | C00213                   |
| Linoleyl ethanolamide                            | 1.4E-05 | 1.5E-05 | 1.8E-05 | 1.7E-05 | No ID                    |
| Fatty acid (12:0)                                | 1.5E-05 | 1.6E-05 | 1.6E-05 | 2.1E-05 | No ID                    |
| Ethyl arachidonate                               | 1.4E-04 | 1.5E-04 | 1.8E-04 | 1.4E-04 | No ID                    |
| Uric acid                                        | 1.2E-02 | 1.2E-02 | 1.3E-02 | 1.3E-02 | C00366                   |
| Succinic acid                                    | 9.5E-04 | 9.9E-04 | 1.0E-03 | 1.2E-03 | C00042                   |
| Fatty acid (19:2)                                | 1.1E-05 | 1.2E-05 | 1.0E-05 | 1.0E-05 | No ID                    |
| Palmitoylcarnitine                               | 1.2E-03 | 1.3E-03 | 7.3E-04 | 9.4E-04 | C02990                   |
| Carnitine                                        | 8.8E-03 | 9.1E-03 | 9.1E-03 | 9.1E-03 | C00318, C00487, C15025   |
| Cholesterol                                      | 7.5E-03 | 7.8E-03 | 7.7E-03 | 8.2E-03 | C00187                   |
| Cytidine                                         | 6.7E-04 | 7.0E-04 | 6.5E-04 | 7.6E-04 | C00475                   |
| Betaine                                          | 3.1E-02 | 3.2E-02 | 2.7E-02 | 2.7E-02 | C00719                   |
| 5-Oxoproline                                     | 9.4E-04 | 9.7E-04 | 7.5E-04 | 9.6E-04 | C01879                   |
| <i>cis</i> -4,7,10,13,16,19-Docosahexaenoic acid | 1.1E-02 | 1.1E-02 | 1.1E-02 | 1.2E-02 | C06429                   |
| Lactic acid                                      | 2.5E-01 | 2.6E-01 | 2.6E-01 | 2.7E-01 | C00186, C00256, C01432   |
| Glu                                              | 1.2E-02 | 1.3E-02 | 1.3E-02 | 1.6E-02 | C00025, C00217, C00302   |
| 6-Hydroxyhexanoic acid                           | 8.2E-05 | 8.4E-05 | 6.4E-05 | 7.9E-05 | C06103                   |
| 2-Aminoisobutyric acid<br>2-Aminobutyric acid    | 5.0E-03 | 5.1E-03 | 4.6E-03 | 3.5E-03 | C03665<br>C02261, C02356 |
| Phe                                              | 3.4E-02 | 3.5E-02 | 3.4E-02 | 3.8E-02 | C00079, C02057, C02265   |
| Stearoyl ethanolamide                            | 3.3E-05 | 3.4E-05 | 3.8E-05 | 3.8E-05 | No ID                    |
| Spermidine                                       | 8.0E-05 | 8.2E-05 | 7.3E-05 | 1.0E-04 | C00315                   |
| Citrulline                                       | 1.1E-02 | 1.2E-02 | 1.0E-02 | 1.1E-02 | C00327                   |
| Creatinine                                       | 1.9E-03 | 1.9E-03 | 1.9E-03 | 1.9E-03 | C00791                   |
| 3-Methylhistidine                                | 3.8E-03 | 3.9E-03 | 3.9E-03 | 3.9E-03 | C01152                   |
| Guanidoacetic acid                               | 3.2E-04 | 3.2E-04 | 3.1E-04 | 3.6E-04 | C00581                   |
| Glutathione (GSSG)_divalent                      | 6.5E-04 | 6.5E-04 | 7.7E-04 | 7.7E-04 | C00127                   |
| Asp                                              | 2.8E-03 | 2.9E-03 | 2.8E-03 | 4.0E-03 | C00049, C00402, C16433   |
| Glucuronic acid                                  | 2.3E-04 | 2.3E-04 | 2.0E-04 | 2.2E-04 | C00191                   |

|                                                                                        |         |         |         |         |                          |
|----------------------------------------------------------------------------------------|---------|---------|---------|---------|--------------------------|
| Stearidonic acid                                                                       | 6.8E-05 | 6.9E-05 | 5.8E-05 | 6.7E-05 | C16300                   |
| 5-Hydroxylysine                                                                        | 1.5E-04 | 1.5E-04 | 1.7E-04 | 1.5E-04 | C16741                   |
| $\gamma$ -Butyrobetaine                                                                | 4.8E-04 | 4.8E-04 | 5.6E-04 | 6.7E-04 | C01181                   |
| Asylcarnitine (fatty acid; 20:0)                                                       | 8.2E-06 | 8.3E-06 | N.D.    | N.D.    | No ID                    |
| Fatty acid (22:4)                                                                      | 3.0E-04 | 3.0E-04 | 3.0E-04 | 2.4E-04 | No ID                    |
| Nicotinamide                                                                           | 1.5E-03 | 1.5E-03 | 1.6E-03 | 1.4E-03 | C00153                   |
| <i>O</i> -Acetylcarnitine                                                              | 2.8E-02 | 2.8E-02 | 3.1E-02 | 2.9E-02 | C02571                   |
| <i>Unknown compound</i>                                                                | 5.6E-05 | 5.6E-05 | 4.4E-05 | 5.3E-05 | No ID                    |
| Asylcarnitine (fatty acid; 14:0)                                                       | 8.2E-04 | 8.2E-04 | 4.7E-04 | 4.6E-04 | No ID                    |
| Gly                                                                                    | 3.5E-02 | 3.5E-02 | 3.8E-02 | 4.0E-02 | C00037                   |
| Asylcarnitine (fatty acid; 20:1)                                                       | 3.4E-05 | 3.4E-05 | 2.3E-05 | 2.3E-05 | No ID                    |
| 5-Hydroxytryptophan                                                                    | 9.2E-06 | 9.2E-06 | 8.8E-06 | 8.7E-06 | C00643                   |
| Glycerol 3-phosphate                                                                   | 1.2E-03 | 1.2E-03 | 1.1E-03 | 1.2E-03 | C00093                   |
| 2-Hydroxyisobutyric acid                                                               | 1.1E-03 | 1.1E-03 | 1.2E-03 | 9.9E-04 | No ID                    |
| Met                                                                                    | 8.8E-03 | 8.8E-03 | 1.0E-02 | 9.7E-03 | C00073, C00855, C01733   |
| <i>N</i> -Acetylglycine                                                                | 5.7E-04 | 5.6E-04 | 6.1E-04 | 6.9E-04 | No ID                    |
| Hecogenin                                                                              | 1.1E-05 | 1.1E-05 | 1.5E-05 | 1.5E-05 | C08902                   |
| Dyphylline                                                                             | 7.4E-03 | 7.3E-03 | 7.4E-03 | 7.8E-03 | C07819                   |
| Leu                                                                                    | 1.2E-01 | 1.2E-01 | 1.2E-01 | 1.3E-01 | C00123, C01570, C16439   |
| Ala                                                                                    | 4.1E-02 | 4.0E-02 | 4.4E-02 | 4.4E-02 | C00041, C00133, C01401   |
| Sitosterol                                                                             | 1.0E-05 | 9.9E-06 | 9.3E-06 | 8.3E-06 | C01753                   |
| <i>S</i> -Sulfocysteine                                                                | 2.4E-04 | 2.3E-04 | 2.4E-04 | 2.2E-04 | C05824                   |
| Arachidonic acid                                                                       | 5.7E-03 | 5.6E-03 | 5.6E-03 | 5.2E-03 | C00219                   |
| Sphinganine                                                                            | 2.1E-05 | 2.1E-05 | 2.1E-05 | 2.3E-05 | C00836                   |
| Isethionic acid                                                                        | 4.9E-04 | 4.8E-04 | 6.0E-04 | 6.2E-04 | C05123                   |
| Asn                                                                                    | 7.2E-03 | 7.0E-03 | 6.9E-03 | 6.8E-03 | C00152, C01905, C16438   |
| Trp                                                                                    | 2.0E-02 | 2.0E-02 | 2.2E-02 | 2.5E-02 | C00078, C00525, C00806   |
| Cholesterol sulfate                                                                    | 4.5E-04 | 4.4E-04 | 4.0E-04 | 4.3E-04 | C18043                   |
| Val                                                                                    | 1.1E-01 | 1.0E-01 | 1.1E-01 | 1.1E-01 | C00183, C06417, C16436   |
| Cysteine glutathione disulfide                                                         | 4.9E-04 | 4.7E-04 | 4.9E-04 | 4.9E-04 | C05526                   |
| <i>N</i> <sup>6</sup> , <i>N</i> <sup>6</sup> , <i>N</i> <sup>6</sup> -Trimethyllysine | 3.6E-04 | 3.5E-04 | 3.7E-04 | 3.4E-04 | C03793                   |
| Anserine_divalent                                                                      | 3.4E-04 | 3.3E-04 | 2.9E-04 | 3.5E-04 | C01262                   |
| Stearic acid                                                                           | 1.9E-03 | 1.8E-03 | 1.7E-03 | 1.7E-03 | C01530                   |
| 4-Methyl-2-oxovaleric acid<br>3-Methyl-2-oxovaleric acid                               | 2.5E-03 | 2.5E-03 | 2.5E-03 | 2.6E-03 | C00233<br>C00671, C03465 |

|                                            |         |         |         |         |                        |
|--------------------------------------------|---------|---------|---------|---------|------------------------|
| 2-Oxoglutaric acid                         | 1.4E-03 | 1.4E-03 | 1.4E-03 | 1.4E-03 | C00026                 |
| Palmitoylethanolamide                      | 4.6E-05 | 4.5E-05 | 4.9E-05 | 5.1E-05 | No ID                  |
| Serotonin                                  | 2.1E-04 | 2.0E-04 | 1.9E-04 | 1.9E-04 | C00780                 |
| Ile                                        | 6.8E-02 | 6.5E-02 | 6.4E-02 | 7.2E-02 | C00407, C06418, C16434 |
| <i>N</i> -Ethylmaleimide_+H <sub>2</sub> O | 3.1E-04 | 3.0E-04 | 3.0E-04 | 3.7E-04 | C02441                 |
| Uridine                                    | 1.8E-03 | 1.8E-03 | 1.8E-03 | 1.9E-03 | C00299                 |
| Lauric acid                                | 1.2E-03 | 1.2E-03 | 1.1E-03 | 1.2E-03 | C02679                 |
| 2-Hydroxyglutaric acid                     | 2.7E-04 | 2.6E-04 | 2.4E-04 | 2.5E-04 | C02630, C01087, C03196 |
| Pro                                        | 3.5E-02 | 3.4E-02 | 3.4E-02 | 3.5E-02 | C00148, C00763, C16435 |
| Erucic acid                                | 5.6E-05 | 5.4E-05 | 4.1E-05 | 4.5E-05 | C08316                 |
| Asylcarnitine (fatty acid; 18:1)           | 1.2E-03 | 1.2E-03 | 5.7E-04 | 9.9E-04 | No ID                  |
| Fatty acid (17:1)                          | 1.1E-04 | 1.1E-04 | 1.2E-04 | 1.1E-04 | No ID                  |
| Choline                                    | 2.3E-02 | 2.1E-02 | 2.2E-02 | 2.4E-02 | C00114                 |
| Ethanolamine                               | 2.2E-03 | 2.1E-03 | 2.4E-03 | 2.3E-03 | C00189                 |
| Fatty acid (16:3)                          | 2.2E-05 | 2.1E-05 | 2.1E-05 | 1.7E-05 | No ID                  |
| Malic acid                                 | 3.8E-03 | 3.6E-03 | 3.3E-03 | 3.9E-03 | C00149, C00497, C00711 |
| Decanoic acid                              | 2.2E-04 | 2.1E-04 | 1.9E-04 | 2.0E-04 | C01571                 |
| 3-Aminobutyric acid                        | 2.1E-04 | 2.0E-04 | 2.7E-04 | 2.9E-04 | No ID                  |
| <i>N</i> <sup>5</sup> -Ethylglutamine      | 3.6E-04 | 3.4E-04 | 3.4E-04 | 3.8E-04 | C01047                 |
| Thr                                        | 4.6E-02 | 4.3E-02 | 4.1E-02 | 4.4E-02 | C00188, C00820         |
| Gln                                        | 1.3E-01 | 1.2E-01 | 1.2E-01 | 1.2E-01 | C00064, C00303, C00819 |
| His                                        | 1.9E-02 | 1.7E-02 | 1.7E-02 | 1.7E-02 | C00135, C00768, C06419 |
| Creatine                                   | 1.0E-01 | 9.2E-02 | 9.0E-02 | 9.7E-02 | C00300                 |
| Asylcarnitine (fatty acid; 12:0)           | 1.5E-04 | 1.4E-04 | 7.7E-05 | 8.6E-05 | No ID                  |
| Homoserine                                 | 1.6E-04 | 1.5E-04 | 1.7E-04 | 1.6E-04 | C00263                 |
| Arg                                        | 3.8E-02 | 3.5E-02 | 3.3E-02 | 3.6E-02 | C00062, C00792         |
| Sphingosine                                | 4.9E-05 | 4.5E-05 | 4.6E-05 | 5.3E-05 | C00319                 |
| 2-Hydroxy-4-methylvaleric acid             | 3.1E-04 | 2.9E-04 | 3.0E-04 | 3.4E-04 | C03264                 |
| 4-Acetamidobutanoic acid                   | 2.1E-04 | 2.0E-04 | 1.6E-04 | 2.4E-04 | C02946                 |
| <i>S</i> -Methylcysteine                   | 3.6E-04 | 3.3E-04 | 3.7E-04 | 3.4E-04 | No ID                  |
| Glyceric acid                              | 5.1E-04 | 4.7E-04 | 4.9E-04 | 5.0E-04 | C00258                 |
| Citric acid                                | 2.8E-02 | 2.6E-02 | 2.4E-02 | 2.7E-02 | C00158                 |
| 2-Oxoisovaleric acid                       | 7.9E-04 | 7.2E-04 | 7.6E-04 | 7.3E-04 | C00141                 |
| Octanoic acid                              | 2.2E-04 | 2.0E-04 | 1.4E-04 | 1.8E-04 | C06423                 |
| Isovalerylalanine                          | 1.3E-03 | 1.1E-03 | 8.2E-04 | 9.3E-04 | No ID                  |

|                                         |         |         |         |         |                        |
|-----------------------------------------|---------|---------|---------|---------|------------------------|
| Fatty acid (14:2)                       | 1.3E-05 | 1.1E-05 | 1.1E-05 | 1.1E-05 | No ID                  |
| <i>N</i> <sup>6</sup> -Acetyllysine     | 2.9E-04 | 2.7E-04 | 2.4E-04 | 2.7E-04 | C02727                 |
| Ornithine                               | 1.8E-02 | 1.6E-02 | 1.7E-02 | 1.9E-02 | C00077, C00515, C01602 |
| Myristic acid                           | 3.0E-04 | 2.7E-04 | 2.8E-04 | 2.5E-04 | C06424                 |
| Campesterol                             | 2.6E-05 | 2.3E-05 | 2.3E-05 | 2.4E-05 | C01789                 |
| Isocitric acid                          | 1.4E-03 | 1.2E-03 | 1.2E-03 | 1.2E-03 | C00311                 |
| Gluconic acid                           | 1.5E-03 | 1.3E-03 | 1.2E-03 | 1.3E-03 | C00257                 |
| Glycerophosphocholine                   | 1.1E-02 | 1.0E-02 | 9.9E-03 | 9.8E-03 | C00670                 |
| <i>N</i> -Acetylaspartic acid           | 8.6E-05 | 7.6E-05 | 8.5E-05 | 1.0E-04 | C01042                 |
| <i>cis</i> -8,11,14-Eicosatrienoic acid | 3.4E-04 | 3.0E-04 | 3.3E-04 | 3.1E-04 | C03242                 |
| Kynurenine                              | 2.2E-04 | 1.9E-04 | 1.5E-04 | 2.3E-04 | C00328, C01718         |
| <i>Unknown compound</i>                 | 1.1E-03 | 9.9E-04 | 7.4E-04 | 8.3E-04 | No ID                  |
| Fatty acid (19:1)                       | 7.5E-05 | 6.5E-05 | 6.3E-05 | 5.7E-05 | No ID                  |
| Butyrylcarnitine                        | 2.7E-04 | 2.4E-04 | 2.0E-04 | 2.3E-04 | C02862                 |
| <i>N</i> <sub>ω</sub> -Methylarginine   | 5.1E-05 | 4.4E-05 | 7.2E-05 | 3.5E-05 | No ID                  |
| Ser                                     | 2.3E-02 | 2.0E-02 | 2.0E-02 | 2.1E-02 | C00065, C00716, C00740 |
| 3-Indoxylsulfuric acid                  | 5.0E-04 | 4.3E-04 | 3.1E-04 | 4.3E-04 | No ID                  |
| β-Ala                                   | 9.7E-04 | 8.3E-04 | 8.8E-04 | 7.7E-04 | C00099                 |
| Palmitic acid                           | 9.9E-03 | 8.4E-03 | 7.9E-03 | 7.5E-03 | C00249                 |
| Hexanoic acid                           | 2.8E-04 | 2.3E-04 | 2.2E-04 | 2.9E-04 | C01585                 |
| Hydroxyproline                          | 8.3E-03 | 6.9E-03 | 6.8E-03 | 7.0E-03 | C01157                 |
| Trimethylamine <i>N</i> -oxide          | 4.4E-04 | 3.7E-04 | 2.3E-04 | 3.1E-04 | C01104                 |
| <i>N</i> -Acetylhistidine               | 7.9E-05 | 6.5E-05 | 6.9E-05 | N.D.    | C02997                 |
| Ricinoleic acid                         | 4.3E-05 | 3.5E-05 | 3.7E-05 | 3.5E-05 | C08365                 |
| 3-Hydroxytetradecanoic acid             | 1.6E-05 | 1.3E-05 | 1.2E-05 | 1.2E-05 | No ID                  |
| <i>cis</i> -11-Eicosenoic acid          | 7.9E-04 | 6.4E-04 | 5.1E-04 | 5.0E-04 | C16526                 |
| <i>Unknown compound</i>                 | 7.6E-04 | 6.2E-04 | 7.4E-04 | 9.6E-04 | No ID                  |
| Asylcarnitine (fatty acid; 12:1)        | 4.5E-05 | 3.7E-05 | 1.7E-05 | 2.4E-05 | No ID                  |
| 5-Methoxyindoleacetic acid              | 1.5E-04 | 1.2E-04 | 1.2E-04 | 1.3E-04 | No ID                  |
| <i>N</i> <sup>6</sup> -Methyllysine     | 5.0E-04 | 4.0E-04 | 4.8E-04 | 4.8E-04 | C02728                 |
| Putrescine                              | 1.8E-04 | 1.4E-04 | 1.6E-04 | 1.7E-04 | C00134                 |
| Pelargonic acid                         | 2.6E-04 | 2.0E-04 | 2.1E-04 | 2.3E-04 | C01601                 |
| Oleoylethanolamine                      | 8.4E-05 | 6.6E-05 | 7.6E-05 | 7.4E-05 | No ID                  |
| Cystine                                 | 7.4E-04 | 5.9E-04 | 6.2E-04 | 5.9E-04 | C00491, C01420         |
| Arachidic acid                          | 5.4E-05 | 4.2E-05 | 2.8E-05 | 2.8E-05 | C06425                 |

|                                  |         |         |         |         |                        |
|----------------------------------|---------|---------|---------|---------|------------------------|
| Myristoleic acid                 | 8.4E-04 | 6.6E-04 | 4.2E-04 | 5.6E-04 | C08322                 |
| Oleic acid                       | 5.9E-03 | 4.7E-03 | 4.2E-03 | 3.9E-03 | C00712                 |
| Guanosine                        | 3.8E-04 | 3.0E-04 | 3.1E-04 | 2.8E-04 | C00387                 |
| <i>Unknown compound</i>          | 2.7E-04 | 2.1E-04 | 2.6E-04 | 3.1E-04 | No ID                  |
| Tyr                              | 1.9E-02 | 1.5E-02 | 1.5E-02 | 1.6E-02 | C00082, C01536, C06420 |
| Lys                              | 7.8E-02 | 6.1E-02 | 6.3E-02 | 6.5E-02 | C00047, C00739, C16440 |
| Histamine                        | 5.7E-05 | 4.3E-05 | 5.7E-05 | 5.8E-05 | C00388                 |
| Indole-3-carboxaldehyde          | 7.7E-05 | 5.9E-05 | 7.0E-05 | 6.8E-05 | C11002                 |
| <i>cis</i> -Aconitic acid        | 9.5E-04 | 7.1E-04 | 7.6E-04 | 9.6E-04 | C00417                 |
| <i>O</i> -Succinylhomoserine     | 8.9E-05 | 6.6E-05 | 6.7E-05 | 8.3E-05 | C01118                 |
| Asylcarnitine (fatty acid; 16:1) | 5.4E-04 | 4.0E-04 | 2.0E-04 | 2.6E-04 | No ID                  |
| Hypoxanthine                     | 8.6E-04 | 6.4E-04 | 8.4E-04 | 1.0E-03 | C00262                 |
| Taurocholic acid                 | 1.5E-05 | 1.1E-05 | 9.6E-06 | N.D.    | C05122                 |
| Cholic acid                      | 8.2E-05 | 6.1E-05 | 1.3E-05 | 3.8E-05 | C00695                 |
| 3-Hydroxybutyric acid            | 2.5E-01 | 1.8E-01 | 2.1E-01 | 2.2E-01 | C01089, C03197         |
| Fatty acid (14:1)-2              | 7.0E-05 | 5.1E-05 | 4.1E-05 | 4.1E-05 | No ID                  |
| Inosine                          | 2.7E-03 | 2.0E-03 | 3.2E-03 | 2.6E-03 | C00294                 |
| Glycerol                         | 1.5E-01 | 1.1E-01 | 1.1E-01 | 1.4E-01 | C00116                 |
| 11-Aminoundecanoic acid          | 7.2E-05 | 5.2E-05 | 6.3E-05 | 7.7E-05 | C19325                 |
| $\alpha$ -Tocopherol             | 5.6E-05 | 3.9E-05 | 3.5E-05 | 2.3E-05 | C02477                 |
| Asylcarnitine (fatty acid; 14:1) | 1.1E-04 | 7.3E-05 | 3.1E-05 | 4.5E-05 | No ID                  |
| Fatty acid (14:1)-1              | 4.2E-05 | 2.8E-05 | N.D.    | 2.7E-05 | No ID                  |
| <i>Unknown compound</i>          | 3.6E-04 | 2.3E-04 | 2.2E-04 | 2.4E-04 | No ID                  |
| Carnosine                        | 7.1E-05 | 4.5E-05 | 4.9E-05 | 5.5E-05 | C00386                 |
| 10-Hydroxydecanoic acid          | 1.5E-04 | 9.1E-05 | 8.7E-05 | 1.1E-04 | C02774                 |
| Diethanolamine                   | 1.0E-04 | 6.1E-05 | 1.5E-04 | 1.4E-04 | C06772                 |
| 8-Hydroxyoctanoic acid           | 2.2E-04 | 1.3E-04 | 1.2E-04 | 1.3E-04 | No ID                  |
| Palmitoleic acid                 | 4.5E-03 | 2.6E-03 | 2.5E-03 | 2.0E-03 | C08362                 |
| Erythrose 4-phosphate            | 1.1E-03 | 6.2E-04 | 7.8E-04 | 7.1E-04 | C00279, C03604         |
| Acetoacetic acid                 | 9.5E-03 | 4.8E-03 | 6.9E-03 | 6.4E-03 | C00164                 |
| <i>Unknown compound</i>          | 7.3E-04 | 3.5E-04 | 5.9E-04 | 7.3E-04 | No ID                  |
| Testosterone                     | 2.5E-05 | 1.1E-05 | 1.7E-05 | 8.8E-06 | C00535                 |
| Fatty acid (20:3)                | 8.1E-04 | 3.4E-04 | 3.1E-04 | 3.1E-04 | No ID                  |
| Triethanolamine                  | 1.1E-04 | 3.9E-05 | 9.5E-05 | 1.9E-04 | C06771                 |
| 1-Methylhistamine                | 4.5E-05 | N.D.    | 6.3E-05 | N.D.    | C05127                 |

|                            |         |      |         |         |        |
|----------------------------|---------|------|---------|---------|--------|
| Hexylamine                 | 1.0E-04 | N.D. | 1.4E-04 | 1.6E-04 | C08306 |
| Adipic acid                | 6.5E-05 | N.D. | N.D.    | 2.6E-04 | C06104 |
| <i>O</i> -Acetylhomoserine | 3.1E-06 | N.D. | N.D.    | 3.5E-06 | C01077 |
| Fatty acid (22:3)          | 1.1E-05 | N.D. | N.D.    | N.D.    | No ID  |
| Isovalerylcarnitine        | N.D.    | N.D. | 9.0E-05 | 9.7E-05 | No ID  |
| Ascorbic acid              | N.D.    | N.D. | N.D.    | 4.5E-05 | C00072 |

N.D., not determined.
